# Supplementary material for: Intensive rehabilitation programme for patients with subacute stroke in an inpatient rehabilitation facility: describing a protocol of a prospective cohort study
Source: HighWire-hosted journal article supplement (doi:10.1136/bmjopen-2020-046346), 2021-10-01
Supplement: bmjopen-2020-046346supp001_data_supplement.pdf [file bmjopen-2020-046346supp001_data_supplement.pdf]

Treatment week: \_\_\_\_\_

Paciente \_\_\_\_\_ ID: \_\_\_\_\_ Date Start Rehab \_\_\_/\_\_\_/\_\_\_

| OT        | Activity                                                                | Session nº__ |
|-----------|-------------------------------------------------------------------------|--------------|--------------|--------------|--------------|--------------|
| Date      |                                                                         |              |              |              |              |              |
| Therapist |                                                                         |              |              |              |              |              |
|           | Bilateral training + therapeutic positioning arm.                       | Time         | Time         | Time         | Time         | Time         |
|           | Task-specific training                                                  | Time         | Time         | Time         | Time         | Time         |
|           | Active-assisted activities using upper limb weight support.             | Time         | Time         | Time         | Time         | Time         |
|           | Postural Control and orthosis use for paretic UULL                      | Time         | Time         | Time         | Time         | Time         |
|           | mCMIT                                                                   | Time         | Time         | Time         | Time         | Time         |
|           | Mirror therapy                                                          | Time         | Time         | Time         | Time         | Time         |
|           | Virtual reality training for the paretic arm (RGS)                      | Time         | Time         | Time         | Time         | Time         |
|           | Interventions somatosensory functions                                   | Time         | Time         | Time         | Time         | Time         |
|           | Cognitive Activities                                                    | Time         | Time         | Time         | Time         | Time         |
|           | ADL interventions + Interventions focusing on environmental adaptations | Time         | Time         | Time         | Time         | Time         |
| TOTAL     |                                                                         |              |              |              |              |              |
| OBS       |                                                                         |              |              |              |              |              |
|           | Stroke class                                                            |              |              |              |              |              |
