# Supplementary material for: Intensive rehabilitation programme for patients with subacute stroke in an inpatient rehabilitation facility: describing a protocol of a prospective cohort study
Source: HighWire-hosted journal article supplement (doi:10.1136/bmjopen-2020-046346), 2021-10-01
Supplement: bmjopen-2020-046346supp003_data_supplement.pdf [file bmjopen-2020-046346supp003_data_supplement.pdf]

Treatment week: \_\_\_\_\_

Patient: \_\_\_\_\_ ID: \_\_\_\_\_ Date Start Rehab \_\_\_\_/\_\_\_\_/\_\_\_\_

| PT        | Activity                                                                                                                                                  | Session nº__ |
|-----------|-----------------------------------------------------------------------------------------------------------------------------------------------------------|--------------|--------------|--------------|--------------|--------------|--------------|
| Date      |                                                                                                                                                           |              |              |              |              |              |              |
| Therapist |                                                                                                                                                           |              |              |              |              |              |              |
|           | Passive exercises hemiplegic extremity: LL and UL                                                                                                         | Time         | Time         | Time         | Time         | Time         | Time         |
|           | Assisted exercises - hemiplegic extremity – LL and UL                                                                                                     | Time         | Time         | Time         | Time         | Time         | Time         |
|           | Active exercises - LL and UL                                                                                                                              | Time         | Time         | Time         | Time         | Time         | Time         |
|           | Balance training during various activities: Training of balance (i.e. maintaining, achieving, or restoring balance) during various activities (stepping). | Time         | Time         | Time         | Time         | Time         | Time         |
|           | Trunk control training                                                                                                                                    | Time         | Time         | Time         | Time         | Time         | Time         |
|           | Body-weight supported treadmill training                                                                                                                  | Time         | Time         | Time         | Time         | Time         | Time         |
|           | Standing training using the standing stretches.                                                                                                           | Time         | Time         | Time         | Time         | Time         | Time         |
|           | Walking over and around obstacles                                                                                                                         | Time         | Time         | Time         | Time         | Time         | Time         |
|           | Training the use of orthosis for walking                                                                                                                  | Time         | Time         | Time         | Time         | Time         | Time         |
|           | Walking activities                                                                                                                                        |              |              |              |              |              |              |
|           | Transfer training                                                                                                                                         | Time         | Time         | Time         | Time         | Time         | Time         |
|           | Aerobic training                                                                                                                                          | Time         | Time         | Time         | Time         | Time         | Time         |
|           | Coordination exercises                                                                                                                                    | Time         | Time         | Time         | Time         | Time         | Time         |
| Total     |                                                                                                                                                           |              |              |              |              |              |              |
| OBS       |                                                                                                                                                           |              |              |              |              |              |              |
